# Supplementary material
Source: publisher figshare collection journal article supplement (https://acs.figshare.com/ndownloader/files/3855280)
Supplement: Supplementary file 1 [file 3855280]

## **SUPPORTING INFORMATION**

### **Process Intensification With Bifunctional Heterogeneous Catalysts: Selective One Pot Synthesis Of 2'-Aminochalcones**

M. J. Climent\*, A. Corma,\* S. Iborra, L. Martí

Instituto de Tecnología Química (UPV-CSIC)  
Universitat Politècnica de València  
Avda dels Tarongers s/n, 46022, Valencia (Spain)  
Fax: (+34) 963877809  
E-mail: [acorma@itq.upv.es](mailto:acorma@itq.upv.es)  
[mjcliol@qim.upv.es](mailto:mjcliol@qim.upv.es)

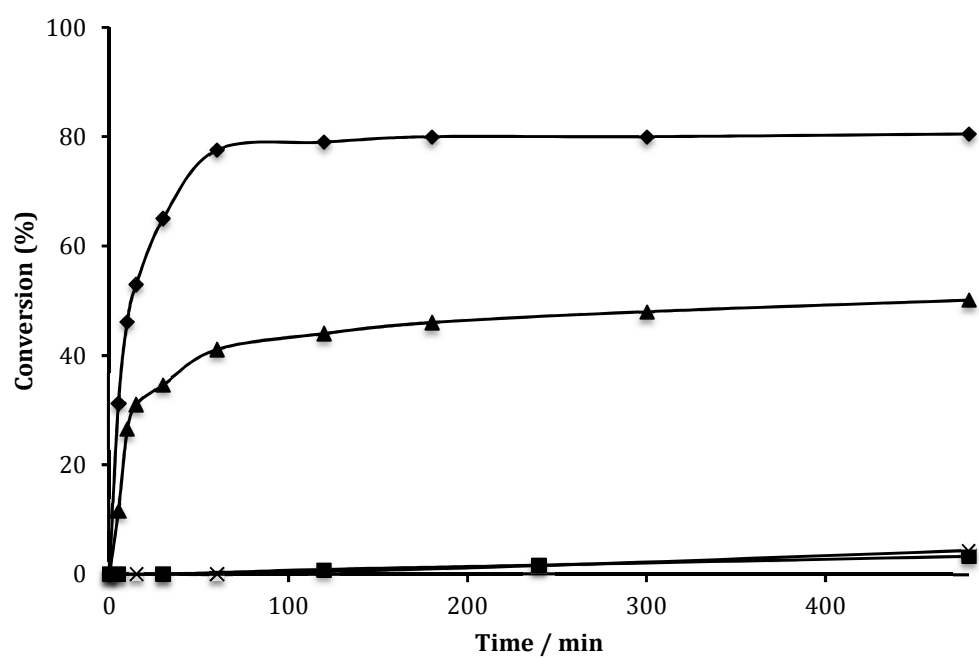

Figure S1. Kinetics of condensation reaction with HTc (●), HTr (▲) and their respective reuses after washing with soxhlet apparatus HTc reused (■), HTr reused (×).

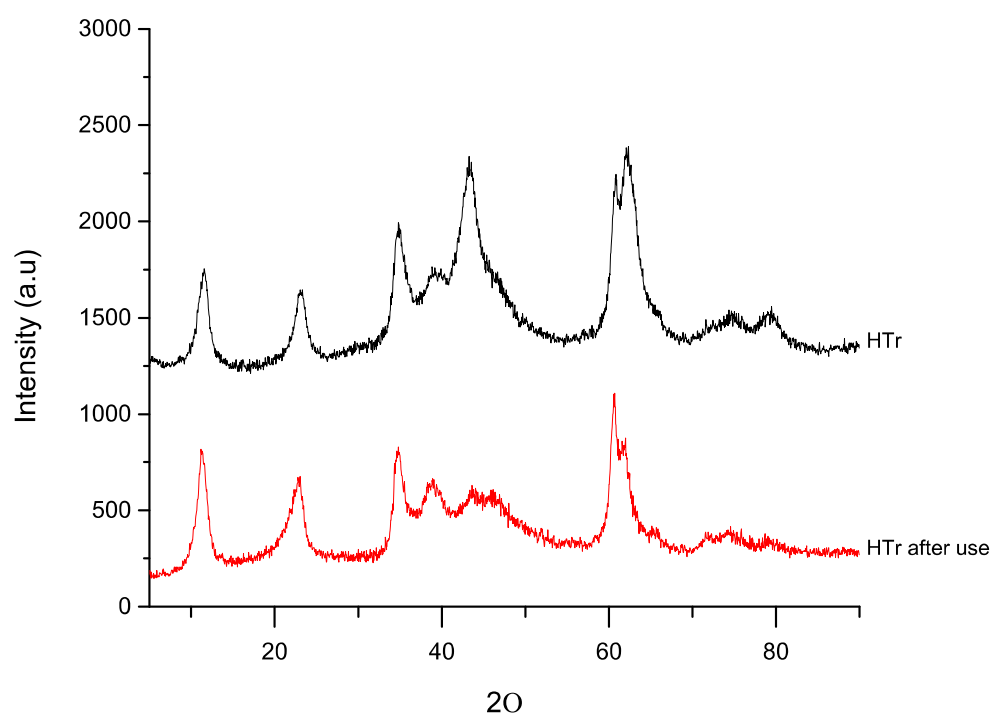

Figure S2. Powder X-ray diffraction (XRD) patterns of the rehydrated Al-Mg mixed oxide before and after use in the condensation reaction

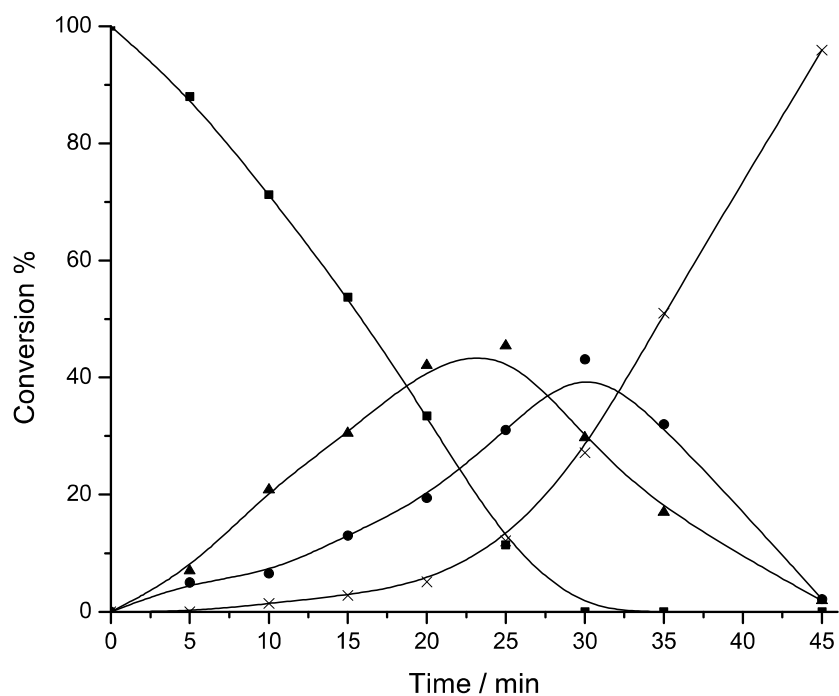

Figure S3. Kinetic curve of the hydrogenation of 2'-nitrochalcone using 0.5wt%Pd-MgO as catalyst, corresponding to Table 3, entry 1. ■ 2'-nitrochalcone, ▲ 2'-nitrosochalcone, ● 2'-aminochalcone, × 1-(2-aminophenyl)-3-phenylpropan-1-one. Reaction conditions: 2'-nitrochalcone (0.5mmol), *o*-xylene (0.5mL), 9 bar of H<sub>2</sub>

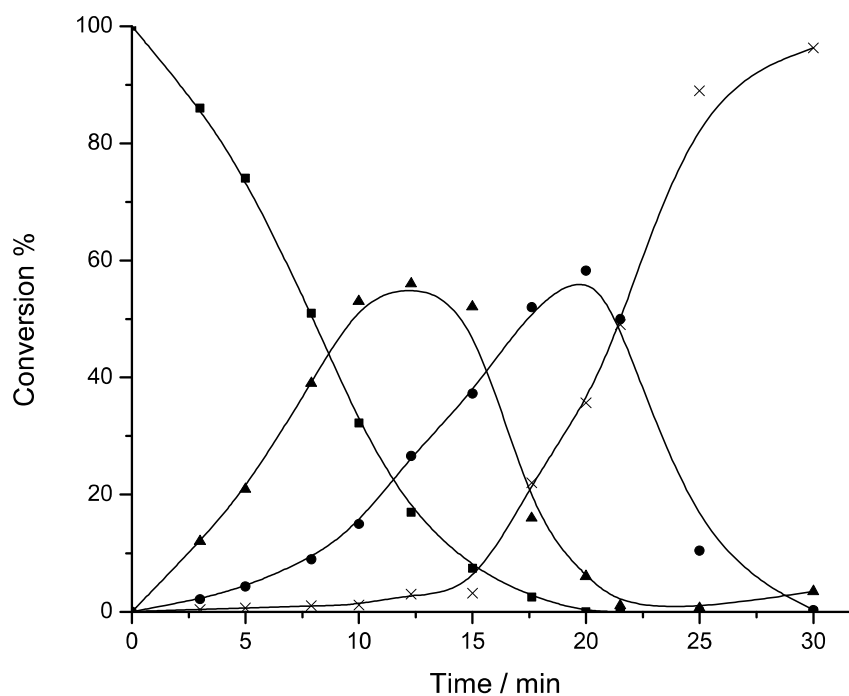

Figure S4. Kinetic curve of the hydrogenation of 2'-nitrochalcone using 1wt%Pt-MgO as catalyst corresponding to Table 3, entry 2. ■ 2'-nitrochalcone, ▲ 2'-nitrosochalcone, ● 2'-aminochalcone, × 1-(2-aminophenyl)-3-phenylpropan-1-one. Reaction conditions: 2'-nitrochalcone (0.5mmol), *o*-xylene (0.5mL), 9 bar of H<sub>2</sub>

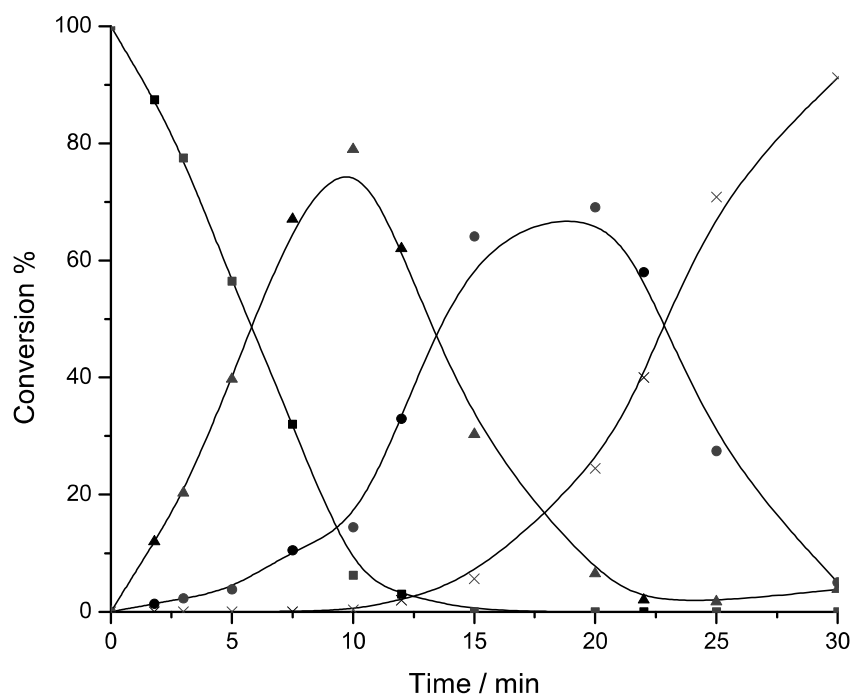

Figure S5. Kinetic curve of the hydrogenation of 2'-nitrochalcone using 0.5wt%Pt-MgO as catalyst corresponding to Table 3, entry 3. ■ 2'-nitrochalcone, ▲ 2'-nitrosochalcone, ● 2'-aminochalcone, × 1-(2-aminophenyl)-3-phenylpropan-1-one. Reaction conditions: 2'-nitrochalcone (0.5mmol), *o*-xylene (0.5mL), 9 bar of H<sub>2</sub>

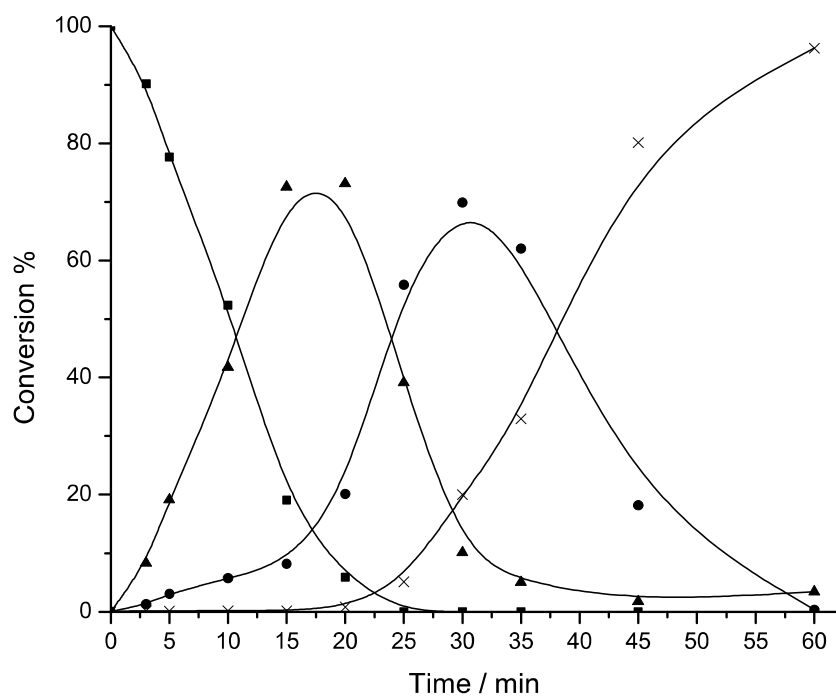

Figure S6. Kinetic curve of the hydrogenation of 2'-nitrochalcone using 0.2wt%Pt-MgO as catalyst corresponding to Table 3, entry 4. ■ 2'-nitrochalcone, ▲ 2'-nitrosochalcone, ● 2'-aminochalcone, × 1-(2-aminophenyl)-3-phenylpropan-1-one. Reaction conditions: 2'-nitrochalcone (0.5mmol), *o*-xylene (0.5mL), 9 bar of H<sub>2</sub>

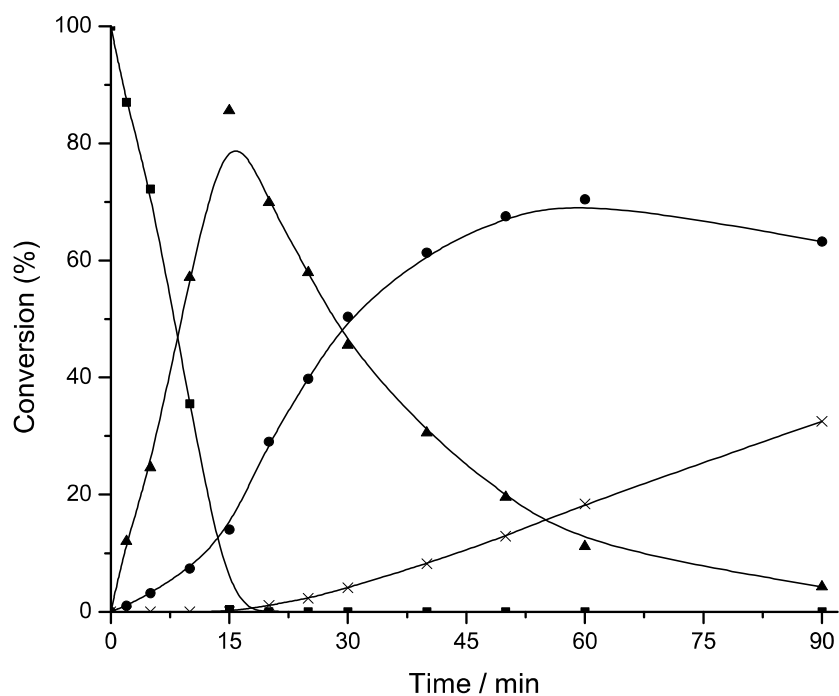

Figure S7. Kinetic curve of the hydrogenation of 2'-nitrochalcone using 0.1wt%Pt-MgO as catalyst corresponding to Table 3, entry 5. ■ 2'-nitrochalcone, ▲ 2'-nitrosochalcone, ● 2'-aminochalcone, × 1-(2-aminophenyl)-3-phenylpropan-1-one. Reaction conditions: 2'-nitrochalcone (0.5mmol), *o*-xylene (0.5mL), 9 bar of H<sub>2</sub>



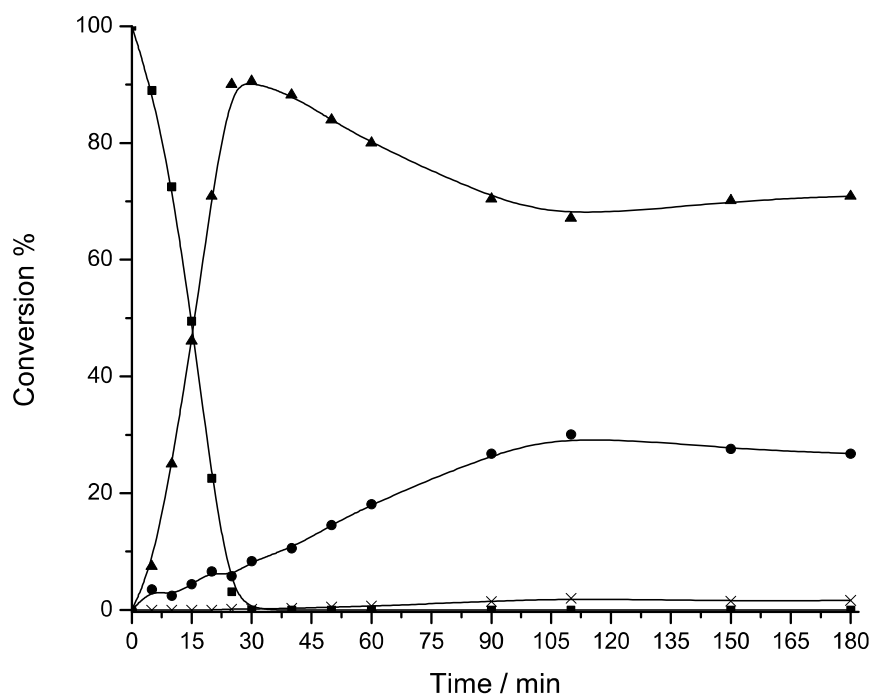

Figure S8. Kinetic curve of the hydrogenation of 2'-nitrochalcone using 0.05wt%Pt-MgO as catalyst corresponding to Table 3, entry 6. ■ 2'-nitrochalcone, ▲ 2'-nitrosochalcone, ● 2'-aminochalcone, × 1-(2-aminophenyl)-3-phenylpropan-1-one. Reaction conditions: 2'-nitrochalcone (0.5mmol), *o*-xylene (0.5mL), 9 bar of H<sub>2</sub>

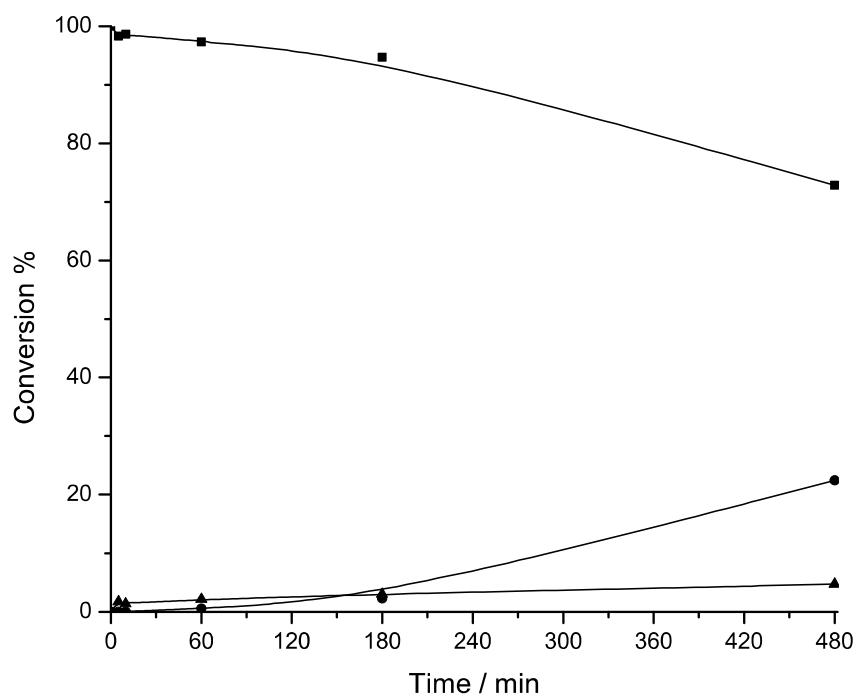

Figure S9. Kinetic curve of the hydrogenation of 2'-nitrochalcone using 0.5wt% Au-MgO as catalyst corresponding to Table 3, entry 7. ■ 2'-nitrochalcone, ▲ 2'-nitrosochalcone, ● 2'-aminochalcone. Reaction conditions: 2'-nitrochalcone (0.5mmol), *o*-xylene (0.5mL), 9 bar of H<sub>2</sub>

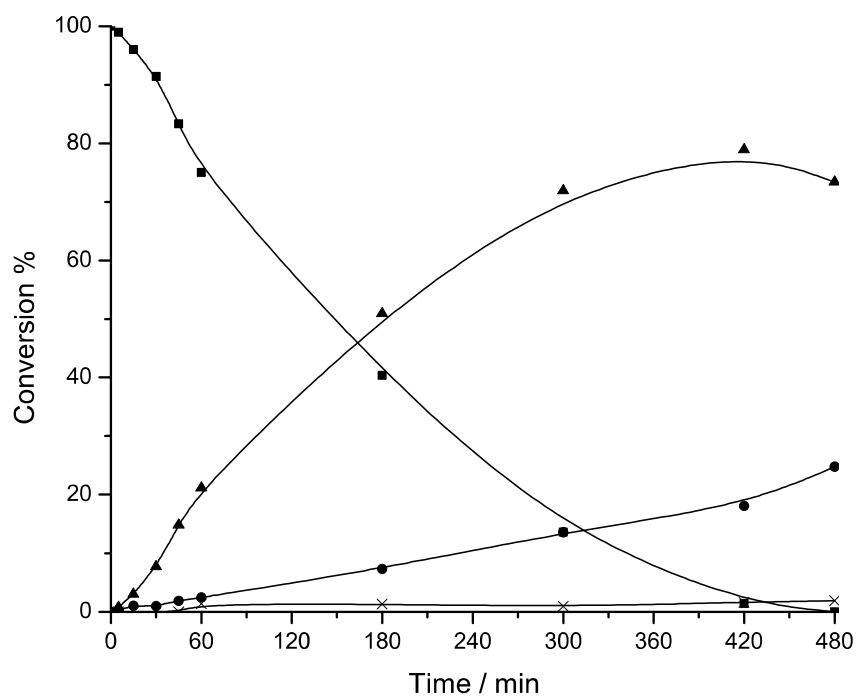

Figure S10. Kinetic curve of the hydrogenation of 2'-nitrochalcone using 1wt%Au-0.01wt%Pt-MgO as catalyst corresponding to Table 3, entry 8. ■ 2'-nitrochalcone, ▲ 2'-nitrosochalcone, ● 2'-aminochalcone, × 1-(2-aminophenyl)-3-phenylpropan-1-one. Reaction conditions: 2'-nitrochalcone (0.5mmol), *o*-xylene (0.5mL), 9 bar of H<sub>2</sub>

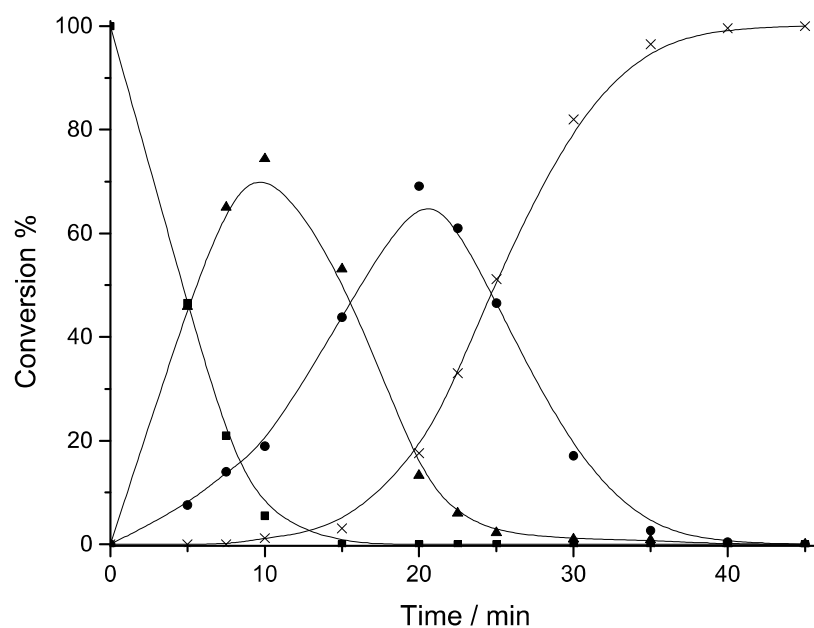

Figure S11. Kinetic curve of the hydrogenation of 2'-nitrochalcone using 0.7wt%Au-0.45wt%Pt-MgO as catalyst, corresponding to Table 3, entry 9. ■ 2'-nitrochalcone, ▲ 2'-nitrosochalcone, ● 2'-aminochalcone, × 1-(2-aminophenyl)-3-phenylpropan-1-one. Reaction conditions: 2'-nitrochalcone (0.5mmol), *o*-xylene (0.5mL), 9 bar of H<sub>2</sub>.

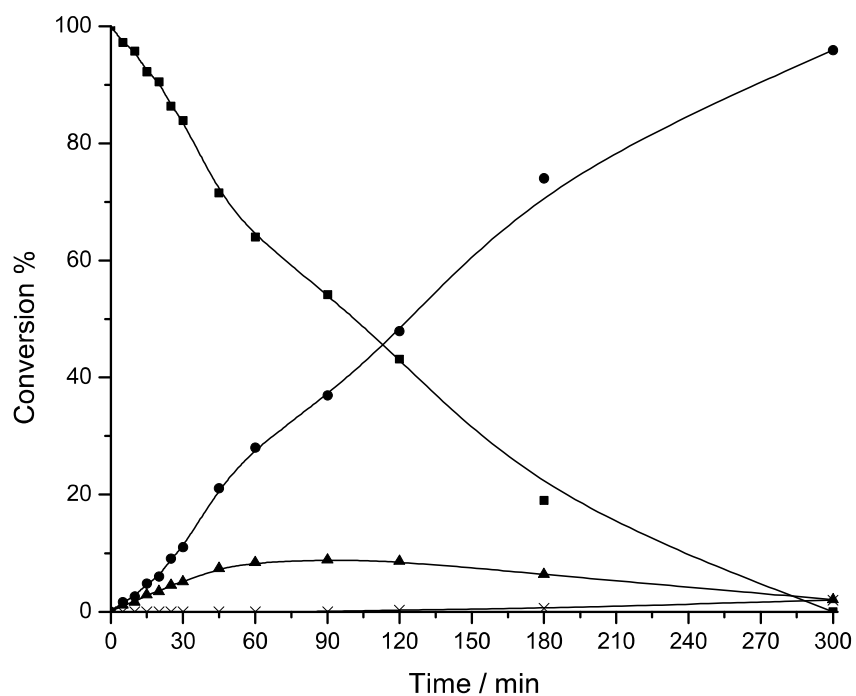

Figure S12. Kinetic curve of the hydrogenation of 2'-nitrochalcone using Au-TiO<sub>2</sub> as catalyst corresponding to Table 3, entry 10. ■ 2'-nitrochalcone, ▲ 2'-nitrosochalcone, ● 2'-aminochalcone, × 1-(2-aminophenyl)-3-phenylpropan-1-one. Reaction conditions: 2'-nitrochalcone (0.5mmol), *o*-xylene (0.5mL), 9 bar of H<sub>2</sub>

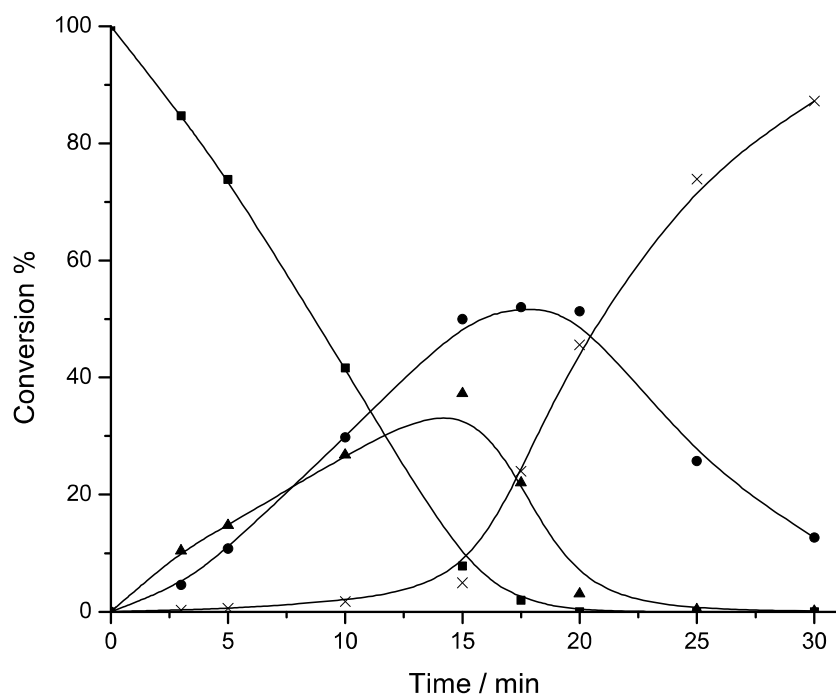

Figure S13. Kinetic curve of the hydrogenation of 2'-nitrochalcone using 0.2wt%Pt-Al<sub>2</sub>O<sub>3</sub> as catalysts corresponding to Table 3, entry 11. ■ 2'-nitrochalcone, ▲ 2'-nitrosochalcone, ● 2'-aminochalcone, × 1-(2-aminophenyl)-3-phenylpropan-1-one. Reaction conditions: 2'-nitrochalcone (0.5mmol), *o*-xylene (0.5mL), 9 bar of H<sub>2</sub>

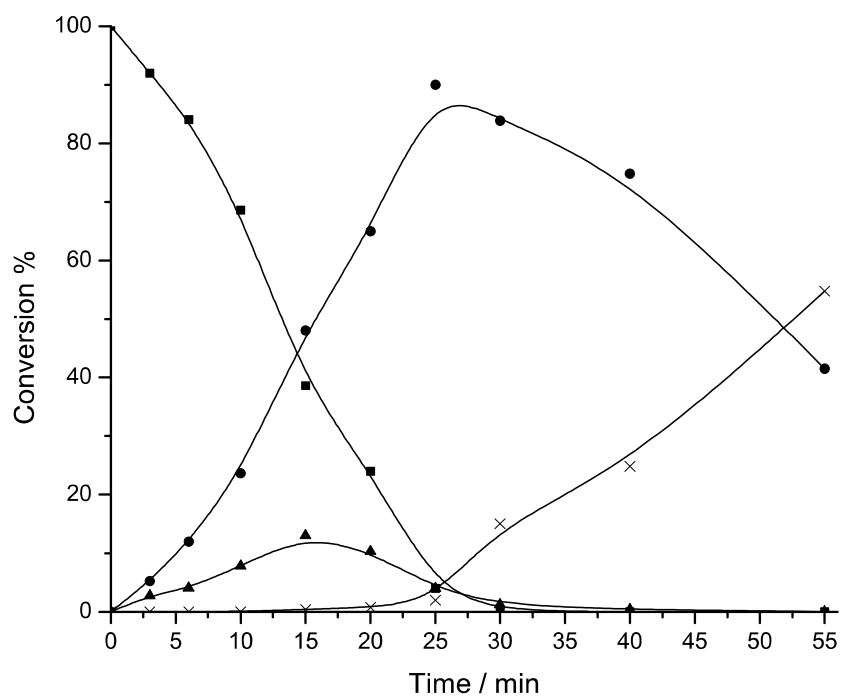

Figure S14. Kinetic curve of the hydrogenation of 2'-nitrochalcone using 0.2wt%Pt-TiO<sub>2</sub> as catalyst corresponding to Table 3, entry 12. ■ 2'-nitrochalcone, ▲ 2'-nitrosochalcone, ● 2'-aminochalcone, × 1-(2-aminophenyl)-3-phenylpropan-1-one. Reaction conditions: 2'-nitrochalcone (0.5mmol), *o*-xylene (0.5mL), 9 bar of H<sub>2</sub>

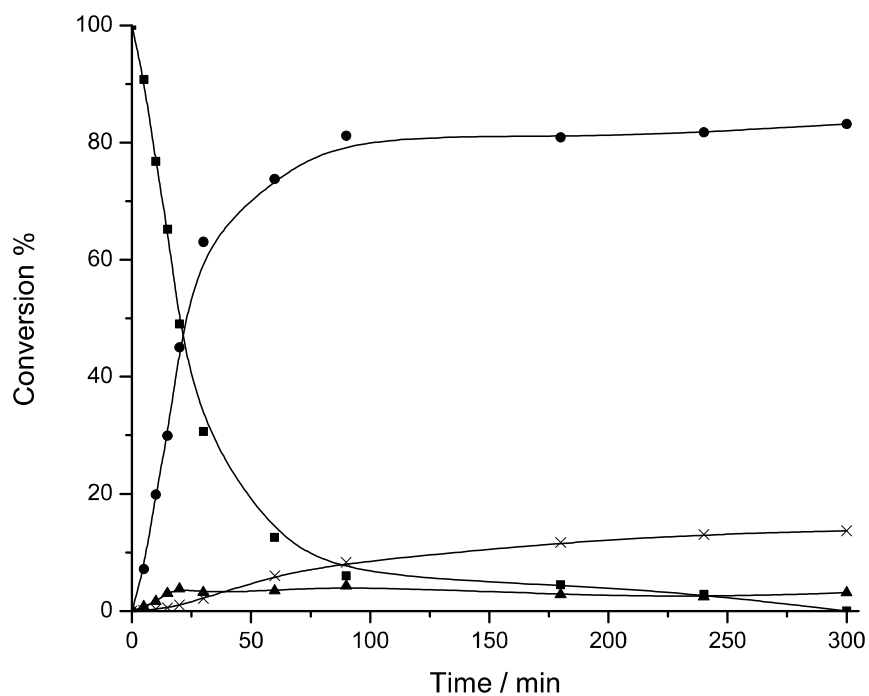

Figure S15. Kinetic curve of the hydrogenation of 2'-nitrochalcone using 0.2wt%Pt-TiO<sub>2</sub>nd (reduced at 200 °C) as catalyst corresponding to Table 3, entry 13. ■ 2'-nitrochalcone, ▲ 2'-nitrosochalcone, ● 2'-aminochalcone, × 1-(2-aminophenyl)-3-phenylpropan-1-one. Reaction conditions: 2'-nitrochalcone (0.5mmol), *o*-xylene (0.5mL), 9 bar of H<sub>2</sub>.



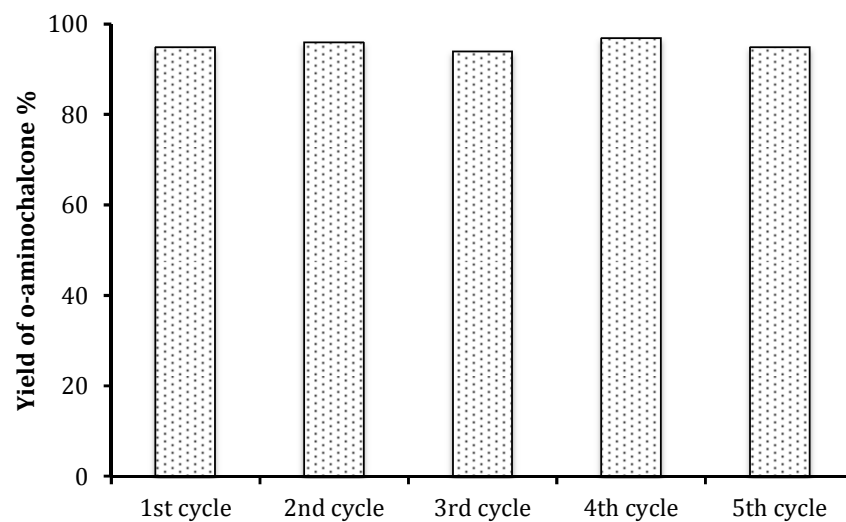

Figure S16. Reuses of Pt-TiO<sub>2</sub> in the hydrogenation of 2'-nitrochalcone after catalyst calcination at 450 °C in reductive atmosphere. Reaction conditions: S/C=2700, 0.5 mmol of 2'-nitrochalcone, 0.5mL *o*-xylene, 70 °C, 9 bar H<sub>2</sub>.

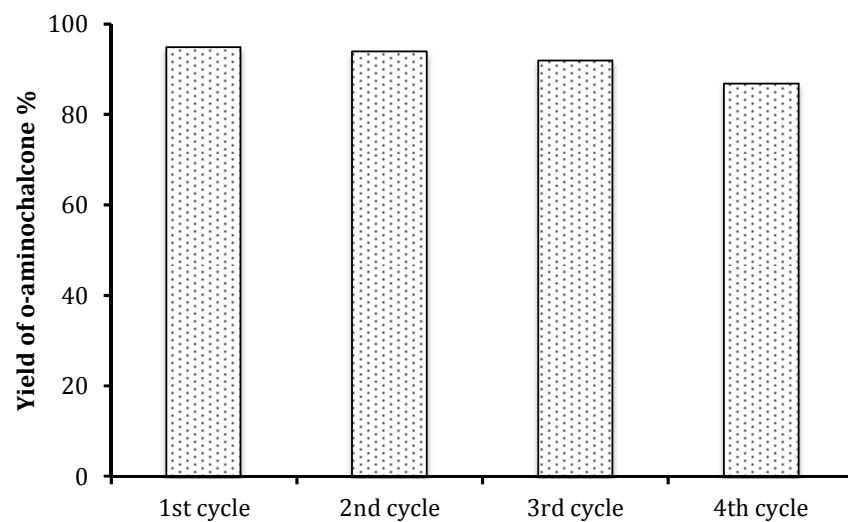

Figure S17. Reuse of Pt-TiO<sub>2</sub> in the hydrogenation of 2'-nitrochalcone after washing the catalyst with dichloromethane. Reaction conditions: S/C=2700, 0.5 mmol of 2'-nitrochalcone, 70 °C, 9 bar H<sub>2</sub>.

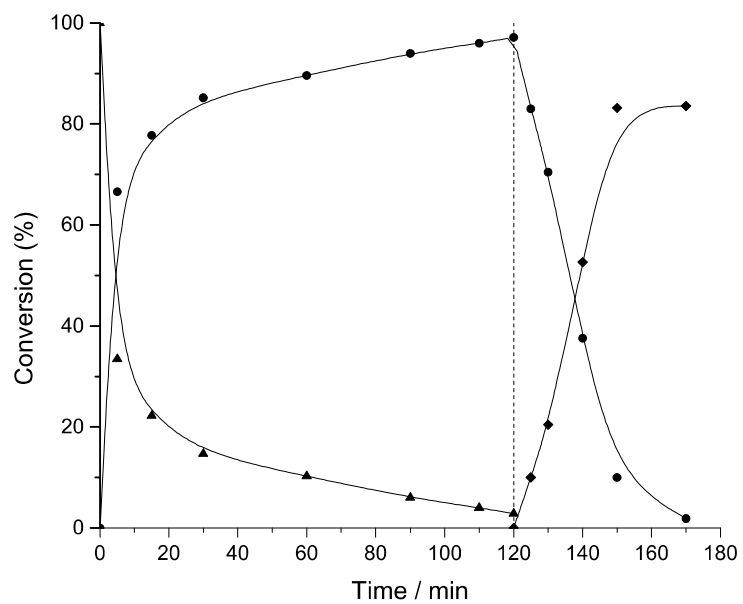

Figure S18. Kinetic of the reaction performed with MgO (30 mg) in the first step at 90°C in nitrogen atmosphere and then the basic catalyst was filtered off and Pt-TiO<sub>2</sub> (30mg) was added to carry out the hydrogenation step at 70°C and 9 bar H<sub>2</sub>. *o*-Nitroacetophenone (▲), 2'-nitrochalcone (●), 2'-aminochalcone (◆). 1mmol of benzaldehyde, 1mmol of 2-nitroacetophenone in 0.5 mL of *o*-xylene

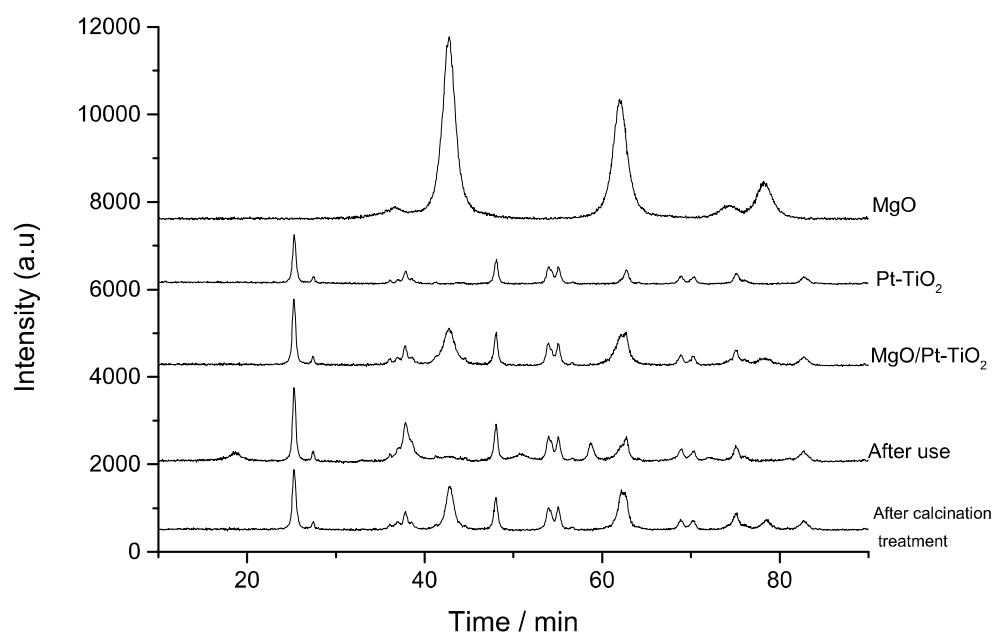

Figure S19. XRD patterns of the fresh MgO, Pt-TiO<sub>2</sub>, the physical mixture (MgO/Pt-TiO<sub>2</sub>) and the physical mixture after use and after calcination treatment.
